# Supplementary material for: Synthesis and characterization of a cyclic 9,9-bis(4-hydroxyphenyl)fluorine (phenylene phosphonate) oligomer and its flame retardancy application
Source: Royal Society of Chemistry journal article supplement (doi:10.1039/c5ra15404a), 2015-01-01
Supplement: c5ra15404a1.pdf [file c5ra15404a1.pdf]

## Supporting Information

Synthesis and characterization of cyclic 9,9-bis(4-hydroxyphenyl)fluorine (phenylene phosphonate) oligomer and its flame retardancy application

Nana Li <sup>a,b</sup>, Guowei Jiang <sup>a</sup>, Guangyuan Zhou <sup>\*,a</sup>

<sup>a</sup> Key Laboratory of Polymer Ecomaterials, Changchun Institute of Applied Chemistry, Chinese Academy of Sciences, Changchun, Jilin, 130022, China.

<sup>b</sup> University of Chinese Academy of Sciences, Beijing, 100049, China.

Author: Nana Li

E-mail: [lnnyy1314@163.com](mailto:lnnyy1314@163.com)

Author: Guowei Jiang

E-mail: [gwjiang@ciac.ac.cn](mailto:gwjiang@ciac.ac.cn)

\*Corresponding author: Guangyuan Zhou

E-mail: [gyzhou@ciac.ac.cn](mailto:gyzhou@ciac.ac.cn)

Phone number: +86-0431-85262204

Fax number: +86-0431-85685653

**Key words:** Cyclic 9,9-bis(4-hydroxyphenyl)fluorine (phenylene phosphonate), polybutylene terephthalate, flame retardancy, TGA, FTIR, pyrolysis/GC/MS

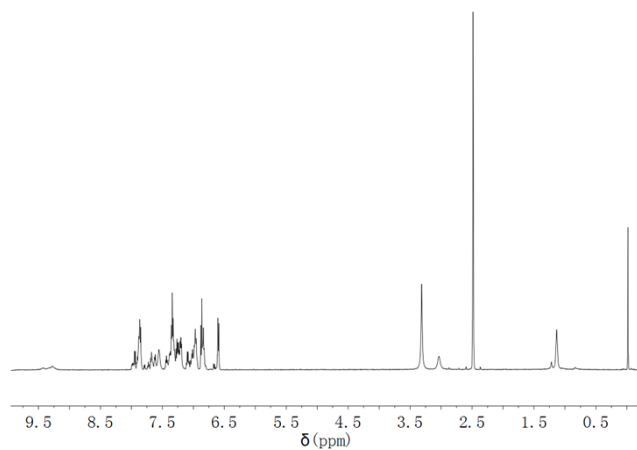

**Fig. S1**  $^1\text{H}$  NMR spectra of CPFP oligomer.

$^1\text{H}$  NMR (DMSO- $d_6$ , ppm):  $\delta$ 6.62 (d, 4H), 6.88(m, 4H), 7.28(m, 2H), 7.36(m, 4H), 7.58(m, 2H), 7.69(m, 1H), 7.88(m, 2H), 7.97(d, 2H) ppm.
